# Supplementary material for: Genomic Adaptations to the Loss of a Conserved Bacterial DNA Methyltransferase
Source: PubMed Central journal article supplement — mBio. 2015 Jul 28;6(4):e00952-15. doi: 10.1128/mBio.00952-15 (PMC4551980; doi:10.1128/mbio.00952-15), 2015-07-28
Supplement: mbo004152397st1.pdf [file mbo004152397st1.pdf]

| Strain | <i>ptsP</i> (CCNA_00892) | Ref. | Called |
|--------|--------------------------|------|--------|
| 1      | NO                       | -    | -      |
| 2      | NO                       | -    | -      |
| 3      | NO                       | -    | -      |
| 4      | NO                       | -    | -      |
| 5      | NO                       | -    | -      |
| 6      | NO                       | -    | -      |
| 7      | NO                       | -    | -      |
| 8      | NO                       | -    | -      |
| 9      | NO                       | -    | -      |
| 10     | NO                       | -    | -      |

| Strain | <i>hprK</i> (CCNA_00239) | Ref. | Called |
|--------|--------------------------|------|--------|
| 1      | NO                       | -    | -      |
| 2      | NO                       | -    | -      |
| 3      | NO                       | -    | -      |
| 4      | NO                       | -    | -      |
| 5      | NO                       | -    | -      |
| 6      | NO                       | -    | -      |
| 7      | NO                       | -    | -      |
| 8      | NO                       | -    | -      |
| 9      | NO                       | -    | -      |
| 10     | NO                       | -    | -      |

| Strain | <i>PftsZ</i> | Ref. | Called |
|--------|--------------|------|--------|
| 1      | NO           | -    | -      |
| 2      | NO           | -    | -      |
| 3      | NO           | -    | -      |
| 4      | NO           | -    | -      |
| 5      | NO           | -    | -      |
| 6      | NO           | -    | -      |
| 7      | NO           | -    | -      |
| 8      | NO           | -    | -      |
| 9      | NO           | -    | -      |
| 10     | NO           | -    | -      |
