# Supplementary material for: Genomic Adaptations to the Loss of a Conserved Bacterial DNA Methyltransferase
Source: PubMed Central journal article supplement — mBio. 2015 Jul 28;6(4):e00952-15. doi: 10.1128/mBio.00952-15 (PMC4551980; doi:10.1128/mbio.00952-15), 2015-07-28
Supplement: mbo004152397st2.pdf [file mbo004152397st2.pdf]

| Strain | ptsP (CCNA_00892) | Ref. | Called |
|--------|-------------------|------|--------|
| 1.1    | NO                | -    | -      |
| 1.2    | 970660            | A    | G      |
| 1.3    | 971475            | C    | G      |
| 1.4    | NO                | -    | -      |
| 2.1    | NO                | -    | -      |
| 2.2    | 970633            | A    | G      |
| 2.3    | NO                | -    | -      |
| 2.4    | 971131            | C    | T      |
| 3.1    | 970633            | A    | G      |
| 3.2    | 970644            | A    | G      |
| 3.3    | 970633            | A    | G      |
| 3.4    | 970525            | C    | T      |

| Strain | hprK (CCNA_00239) | Ref. | Called |
|--------|-------------------|------|--------|
| 1.1    | 254890            | G    | A      |
| 1.2    | NO                | -    | -      |
| 1.3    | NO                | -    | -      |
| 1.4    | 254890            | G    | A      |
| 2.1    | NO                | -    | -      |
| 2.2    | NO                | -    | -      |
| 2.3    | 254854            | T    | G      |
| 2.4    | NO                | -    | -      |
| 3.1    | NO                | -    | -      |
| 3.2    | NO                | -    | -      |
| 3.3    | NO                | -    | -      |
| 3.4    | NO                | -    | -      |

| Strain | CCNA_01943 | Ref. | Called |
|--------|------------|------|--------|
| 1.1    | NO         | -    | -      |
| 1.2    | NO         | -    | -      |
| 1.3    | NO         | -    | -      |
| 1.4    | NO         | -    | -      |
| 2.1    | NO         | -    | -      |
| 2.2    | NO         | -    | -      |
| 2.3    | NO         | -    | -      |
| 2.4    | NO         | -    | -      |
| 3.1    | NO         | -    | -      |
| 3.2    | NO         | -    | -      |
| 3.3    | NO         | -    | -      |
| 3.4    | NO         | -    | -      |

| Strain | PftsZ | Ref. | Called |
|--------|-------|------|--------|
| 1.1    | NO    | -    | -      |
| 1.2    | NO    | -    | -      |
| 1.3    | NO    | -    | -      |
| 1.4    | NO    | -    | -      |
| 2.1    | NO    | -    | -      |
| 2.2    | NO    | -    | -      |
| 2.3    | NO    | -    | -      |
| 2.4    | NO    | -    | -      |
| 3.1    | NO    | -    | -      |
| 3.2    | NO    | -    | -      |
| 3.3    | NO    | -    | -      |
| 3.4    | NO    | -    | -      |
