# Supplementary material for: Genomic Adaptations to the Loss of a Conserved Bacterial DNA Methyltransferase
Source: PubMed Central journal article supplement — mBio. 2015 Jul 28;6(4):e00952-15. doi: 10.1128/mBio.00952-15 (PMC4551980; doi:10.1128/mbio.00952-15), 2015-07-28
Supplement: mbo004152397st3.pdf [file mbo004152397st3.pdf]

**A. Single nucleotide mutations found in NA1000**

| Position | Ref. | Called | Found  | Annotation                                                                                                                                              |
|----------|------|--------|--------|---------------------------------------------------------------------------------------------------------------------------------------------------------|
| 1022864  | .    | G      | All    | Intragenic in CCNA_00944 (flagellar hook length determination protein, 1021867-1023069)                                                                 |
| 1068005  | A    | .      | All    | Intragenic in CCNA_00987 (hypothetical protein, 1067843-1068046)                                                                                        |
| 1891810  | C    | .      | All    | Extragenic between CCNA_01762 (hypothetical protein, 1890632-1891771) and CCNA_01763 (leucyl aminopeptidase,1891999-1893480)                            |
| 1927487  | T    | C      | All    | Intragenic in CCNA_01803 (pyruvate dehydrogenase complex, dihydrolipoamide acetyltransferase component, 1926921-1928207)                                |
| 3026719  | C    | G      | All    | Extragenic between CCNA_02878 (genetic exchange protein, putative, 3026557-3026715) and CCNA_02879 (genetic exchange related protein,3026790-3026885)   |
| 3202983  | .    | G      | All    | Extragenic between CCNA_03048 (para-aminobenzoate synthetase component I, 3201391-3202965) and CCNA_03049 (MFS superfamily transporter,3203019-3204485) |
| 3713704  | C    | G      | All    | Intragenic in CCNA_03557 (hypothetical protein, 3713085-3713840)                                                                                        |
| 2667017  | C    | G      | NA1000 | Extragenic between CCNA_02516 (glutathione S-transferase, 2666167-2666892) and CCNA_02517 (hypothetical protein,2667018-2667611)                        |

**B. Point mutations found in the ancestral *ΔccrM* strains**

| Position | Ref. | Called | JC1049 | JC1050 | JC1051 | Annotation                                                                                                                                                    |
|----------|------|--------|--------|--------|--------|---------------------------------------------------------------------------------------------------------------------------------------------------------------|
| 415311   | T    | C      |        |        |        | Extragenic between CCNA_00397 (hypothetical protein, 413741-415279) and CCNA_00398 (hypothetical protein, 415406-416755)                                      |
| 415316   | G    | C      |        |        |        | Extragenic between CCNA_00397 (hypothetical protein, 413741-415279) and CCNA_00398 (hypothetical protein, 415406-416755)                                      |
| 1294567  | T    | C      |        |        |        | Extragenic between CCNA_01174 (LysR family transcriptional regulator, 1293570-1294526) and CCNA_01175 (uroporphyrin-III C-methyltransferase, 1294712-1295635) |
| 1893916  | G    | T      |        |        |        | Intragenic in CCNA_01764 (DNA polymerase III subunit chi, 1893601-1894062)                                                                                    |
