# Supplementary material for: Genomic Adaptations to the Loss of a Conserved Bacterial DNA Methyltransferase
Source: PubMed Central journal article supplement — mBio. 2015 Jul 28;6(4):e00952-15. doi: 10.1128/mBio.00952-15 (PMC4551980; doi:10.1128/mbio.00952-15), 2015-07-28
Supplement: mbo004152397st4.pdf [file mbo004152397st4.pdf]

| <b>Table 4A: Bacterial strains</b> |                                                                                    |                                  |
|------------------------------------|------------------------------------------------------------------------------------|----------------------------------|
| <b>Name</b>                        | <b>Genotype</b>                                                                    | <b>Construction or reference</b> |
| <i>Caulobacter crescentus</i>      |                                                                                    |                                  |
| NA1000                             | Synchronizable derivative of the wild-type strain CB15                             | [1]                              |
| CMS2                               | NA1000 carrying a kan <sup>R</sup> resistance marker 239808–240826 (CC0222–0224)   | [2]                              |
| CMS9                               | NA1000 carrying a kan <sup>R</sup> resistance marker 939587–940578 (CC0843–0844)   | [2]                              |
| CMS21                              | NA1000 carrying a kan <sup>R</sup> resistance marker 2049425–2050600 (CC1853–1855) | [2]                              |
| CMS28                              | NA1000 carrying a kan <sup>R</sup> resistance marker 2742248–2743137 (CC2537–2538) | [2]                              |
| CMS33                              | NA1000 carrying a kan <sup>R</sup> resistance marker 3256387–3257298 (CC3039–3040) | [2]                              |
| JC1149, JC1150, JC1151             | NA1000 $\Delta$ <i>ccrM::</i> $\Omega$                                             | [3] This work.                   |
| JC1299                             | Evolved JC1149 clone, population 1.1, 300 generations                              | This work.                       |
| JC1300                             | Evolved JC1149 clone, population 1.2, 300 generations                              | This work.                       |
| JC1301                             | Evolved JC1149 clone, population 1.3, 300 generations                              | This work.                       |
| JC1302                             | Evolved JC1149 clone, population 1.4, 300 generations                              | This work.                       |
| JC1303                             | Evolved JC1150 clone, population 2.1, 300 generations                              | This work.                       |
| JC1304                             | Evolved JC1150 clone, population 2.2, 300 generations                              | This work.                       |
| JC1305                             | Evolved JC1150 clone, population 2.3, 300 generations                              | This work.                       |
| JC1306                             | Evolved JC1150 clone, population 2.4, 300 generations                              | This work.                       |
| JC1307                             | Evolved JC1151 clone, population 3.1, 300 generations                              | This work.                       |
| JC1308                             | Evolved JC1151 clone, population 3.2, 300 generations                              | This work.                       |
| JC1309                             | Evolved JC1151 clone, population 3.3, 300 generations                              | This work.                       |

|        |                                                                                                                     |            |
|--------|---------------------------------------------------------------------------------------------------------------------|------------|
| JC1310 | Evolved JC1151 clone, population 3.4, 300 generations                                                               | This work. |
| JC1311 | Evolved JC1149 clone, population 1.2, 50 generations                                                                | This work. |
| JC1312 | Evolved JC1151 clone, population 3.1, 50 generations                                                                | This work. |
| JC1320 | NA1000 carrying the kan <sup>R</sup> marker of CMS2                                                                 | This work. |
| JC1322 | NA1000 carrying the kan <sup>R</sup> marker of CMS28                                                                | This work. |
| JC1329 | NA1000 carrying the kan <sup>R</sup> marker of CMS9.                                                                | This work. |
| JC1323 | NA1000 carrying the kan <sup>R</sup> marker of CMS2 and the SNP found in <i>hprK</i> in JC1302                      | This work. |
| JC1336 | NA1000 carrying the kan <sup>R</sup> marker of CMS9 and the SNP found in <i>ptsP</i> in JC1300                      | This work. |
| JC1327 | NA1000 carrying the kan <sup>R</sup> marker of CMS21 and the SNP found in CCNA_01943 in JC1302                      | This work. |
| JC1325 | NA1000 carrying the kan <sup>R</sup> marker of CMS28 and the SNP found in the <i>ftsZ</i> promoter region in JC1299 | This work. |
| JC1328 | NA1000 carrying the kan <sup>R</sup> marker of CMS28 and the SNP found in the <i>ftsZ</i> promoter region in JC1301 | This work. |
| JC1338 | NA1000 carrying the kan <sup>R</sup> marker of CMS28 and the SNP found in the <i>ftsZ</i> promoter region in JC1306 | This work. |
| JC1343 | NA1000 carrying the kan <sup>R</sup> marker of CMS33 and the SNP found in <i>ctrA</i> in JC1300                     | This work. |
| JC1347 | JC1322 $\Delta$ <i>ccrM</i> :: $\Omega$                                                                             | This work. |
| JC1339 | JC1323 $\Delta$ <i>ccrM</i> :: $\Omega$                                                                             | This work. |
| JC1340 | JC1336 $\Delta$ <i>ccrM</i> :: $\Omega$                                                                             | This work. |
| JC1344 | JC1327 $\Delta$ <i>ccrM</i> :: $\Omega$                                                                             | This work. |
| JC1345 | JC1325 $\Delta$ <i>ccrM</i> :: $\Omega$                                                                             | This work. |
| JC1341 | JC1328 $\Delta$ <i>ccrM</i> :: $\Omega$                                                                             | This work. |
| JC1342 | JC1338 $\Delta$ <i>ccrM</i> :: $\Omega$                                                                             | This work. |
| JC1346 | JC1343 $\Delta$ <i>ccrM</i> :: $\Omega$                                                                             | This work. |
| JC1353 | JC1320 <i>placZ290-PftsZ</i> -WT                                                                                    | This work. |

|        |                                            |            |
|--------|--------------------------------------------|------------|
| JC1354 | JC1323 <i>placZ290-PftsZ</i> -WT           | This work. |
| JC1369 | JC1336 <i>placZ290-PftsZ</i> -WT           | This work. |
| JC1368 | JC1327 <i>placZ290-PftsZ</i> -WT           | This work. |
| JC1370 | JC1343 <i>placZ290-PftsZ</i> -WT           | This work. |
| JC1371 | JC1353 $\Delta$ <i>ccrM</i> :: $\Omega$    | This work. |
| JC1372 | JC1354 $\Delta$ <i>ccrM</i> :: $\Omega$    | This work. |
| JC1386 | JC1369 $\Delta$ <i>ccrM</i> :: $\Omega$    | This work. |
| JC1387 | JC1368 $\Delta$ <i>ccrM</i> :: $\Omega$    | This work. |
| JC1388 | JC1370 $\Delta$ <i>ccrM</i> :: $\Omega$    | This work. |
| JC1383 | NA1000 <i>placZ290-PftsZ</i> -SNP 1.1      | This work. |
| JC1384 | NA1000 <i>placZ290-PftsZ</i> -SNP 1.3      | This work. |
| JC1385 | NA1000 <i>placZ290-PftsZ</i> -SNP 2.4      | This work. |
| JC1378 | JC1320 <i>placZ290-mipZP</i>               | This work. |
| JC1379 | JC1323 <i>placZ290-mipZP</i>               | This work. |
| JC1381 | JC1336 <i>placZ290-mipZP</i>               | This work. |
| JC1398 | JC1329 <i>placZ290-PftsZ</i> -AT           | This work. |
| JC1401 | JC1329 <i>placZ290-PftsZ</i> - <i>ctrA</i> | This work. |
| JC1399 | JC1329 <i>placZ290-PftsZ</i> - <i>dnaA</i> | This work. |
| JC1402 | JC1336 <i>placZ290-PftsZ</i> -AT           | This work. |
| JC1405 | JC1336 <i>placZ290-PftsZ</i> - <i>ctrA</i> | This work. |
| JC1403 | JC1336 <i>placZ290-PftsZ</i> - <i>dnaA</i> | This work. |

| <b>Table 4B : Plasmids</b>     |                                                                                                         |                  |
|--------------------------------|---------------------------------------------------------------------------------------------------------|------------------|
| <b>Name</b>                    | <b>Description</b>                                                                                      | <b>Reference</b> |
| <i>placZ290</i>                | Low copy number vector, usually used to create <i>lacZ</i> transcriptional fusion.                      | [4]              |
| <i>placZ290-PftsZ</i> -WT      | <i>placZ290</i> containing the wild-type <i>fzsZ</i> promoter region.                                   | [3]              |
| <i>placZ290-mipZP</i>          | <i>placZ290</i> containing the wild-type <i>mipZ</i> promoter region.                                   | [5]              |
| <i>placZ290-PftsZ</i> -AT      | <i>placZ290</i> containing the <i>fzsZ</i> promoter region, mutated at a conserved GANTC (A becomes T). | [3].             |
| <i>placZ290-PftsZ</i> -SNP 1.1 | <i>placZ290</i> containing the <i>fzsZ</i> promoter region carrying the SNP present in strain JC1299.   | This work.       |
| <i>placZ290-PftsZ</i> -SNP 1.3 | <i>placZ290</i> containing the <i>fzsZ</i> promoter region carrying the SNP present in strain           | This work.       |

|                               |                                                                                                          |            |
|-------------------------------|----------------------------------------------------------------------------------------------------------|------------|
|                               | JC1301.                                                                                                  |            |
| <i>placZ290-PftsZ-SNP 2.4</i> | <i>placZ290</i> containing the <i>ftsZ</i> promoter region carrying the SNP present in strain JC1306.    | This work. |
| <i>placZ290-PftsZ-ctrA</i>    | <i>placZ290</i> containing the <i>ftsZ</i> promoter region carrying mutations in the CtrA binding sites. | This work. |
| <i>placZ290-PftsZ-dnaA</i>    | <i>placZ290</i> containing the <i>ftsZ</i> promoter region carrying mutations in the DnaA binding sites. | This work. |

| Table 5C : Primers |                                                                                                |
|--------------------|------------------------------------------------------------------------------------------------|
| Name               | Sequence                                                                                       |
| HRM_hprK_F         | ACG CCG AGA ACC GCA AGG AC                                                                     |
| HRM_hprK_R         | CCC GCA GCG AAA GTC ACG AC                                                                     |
| HRM_CCNA_01943_F   | CCG CCG GTC GAG GTG GAG                                                                        |
| HRM_CCNA_01943_R   | TTT TCG ACG CTG GGC AGG TG                                                                     |
| HRM_PftsZ_F        | GCG GCG CGG AAA GAG AAA TAG                                                                    |
| HRM_PftsZ_R        | CGA CCG GAC CAC GAC TCA GAT TA                                                                 |
| Seq_ptsP_F         | GCA AGC TGG ACG TGG TGG TG                                                                     |
| Seq_ptsP_R         | GAG GCC GGC ATT CAT CAA CAG                                                                    |
| Seq_hprK_F         | CGA ACG GGG CGG TGG TC                                                                         |
| Seq_hprK_R         | CGC GGG CGG TCT TGA TAC                                                                        |
| Seq_ctrA_F         | CCT TTT GGG TGG GCG TTT CTG                                                                    |
| Seq_ctrA_R         | CGC CTG CGA CCA ATG TGT TCA                                                                    |
| ftsZP_DnaA_mut_R   | GTG GTC CGG TCG AGC GGG ACC GTA CGT TAA ATT GTG GTC<br>TAA CAA GTG AAT CCC CCA ATG AAC CAA AGG |
| ftsZP_DnaA_mut_F   | TCC CGC TCG ACC GGA CCA CGA C                                                                  |
| ftsZP_CtrA_mut_F   | CGG TCC CGC TCG ACC GGA CCA CGA CTC AGA TTA TGC AGA<br>ATT CCG CCG ATT AAC GAT GG              |
| ftsZP_CtrA_mut_R   | TGC ATA ATC TGA GTC GTG GTC CGG TCG                                                            |

1. Evinger, M. and N. Agabian, *Envelope-associated nucleoid from Caulobacter crescentus stalked and swarmer cells*. J Bacteriol, 1977. **132**(1): p. 294-301.
2. West, L., D. Yang, and C. Stephens, *Use of the Caulobacter crescentus genome sequence to develop a method for systematic genetic mapping*. J Bacteriol, 2002. **184**(8): p. 2155-66.
3. Gonzalez, D. and J. Collier, *DNA methylation by CcrM activates the transcription of two genes required for the division of Caulobacter crescentus*. Mol Microbiol, 2013. **88**(1): p. 203-18.
4. Gober, J.W. and L. Shapiro, *A developmentally regulated Caulobacter flagellar promoter is activated by 3' enhancer and IHF binding elements*. Mol Biol Cell, 1992. **3**(8): p. 913-26.
5. Fernandez-Fernandez, C., D. Gonzalez, and J. Collier, *Regulation of the Activity of the Dual-Function DnaA Protein in Caulobacter crescentus*. PLoS One, 2011. **6**(10): p. e26028.
