# Supplementary figures and images for: Genomic Adaptations to the Loss of a Conserved Bacterial DNA Methyltransferase
Source: PubMed Central journal article supplement — mBio. 2015 Jul 28;6(4):e00952-15. doi: 10.1128/mBio.00952-15 (PMC4551980; doi:10.1128/mbio.00952-15), 2015-07-28

**A**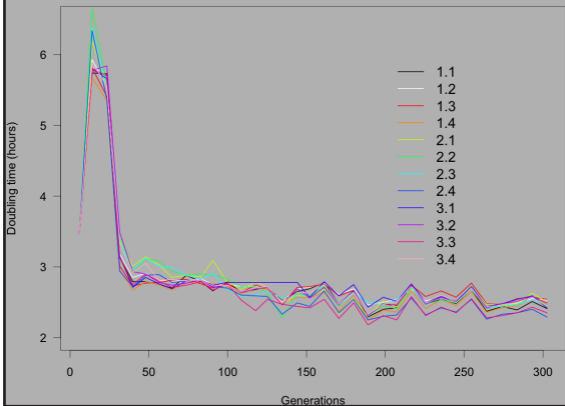**B**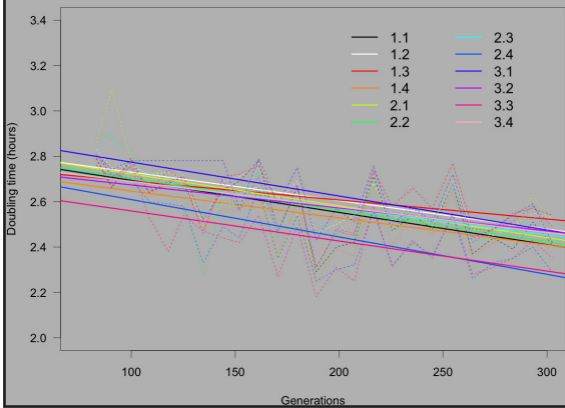

Supplement: mbo004152397sf1.pdf [file mbo004152397sf1.pdf]

M2G

PYE, 5 gen.

PYE, 15 gen.

HPrk, 1.4

E<sup>Ntr</sup>, 1.2

CCNA01943, 1.4

PftsZ, 1.1

PftsZ, 1.3

PftsZ, 2.4

CtrA, 1.2

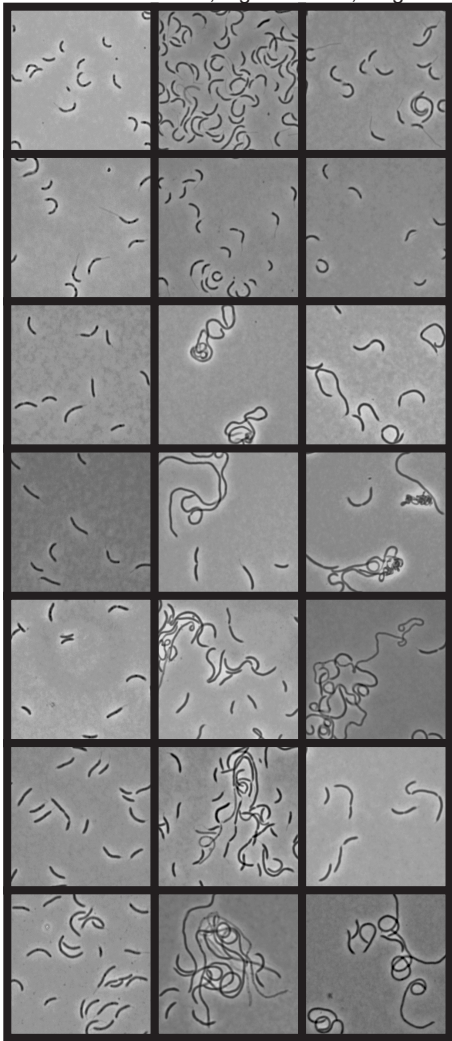

Supplement: mbo004152397sf2.pdf [file mbo004152397sf2.pdf]

**A**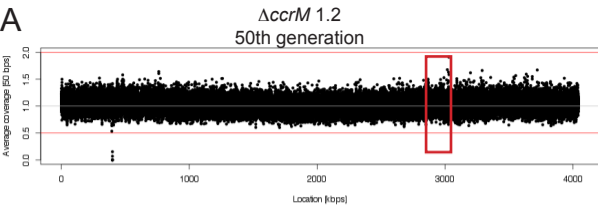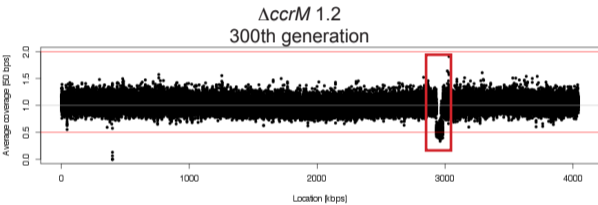**B**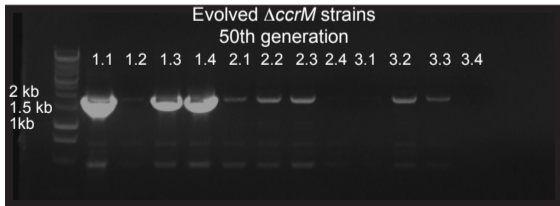

Supplement: mbo004152397sf3.pdf [file mbo004152397sf3.pdf]

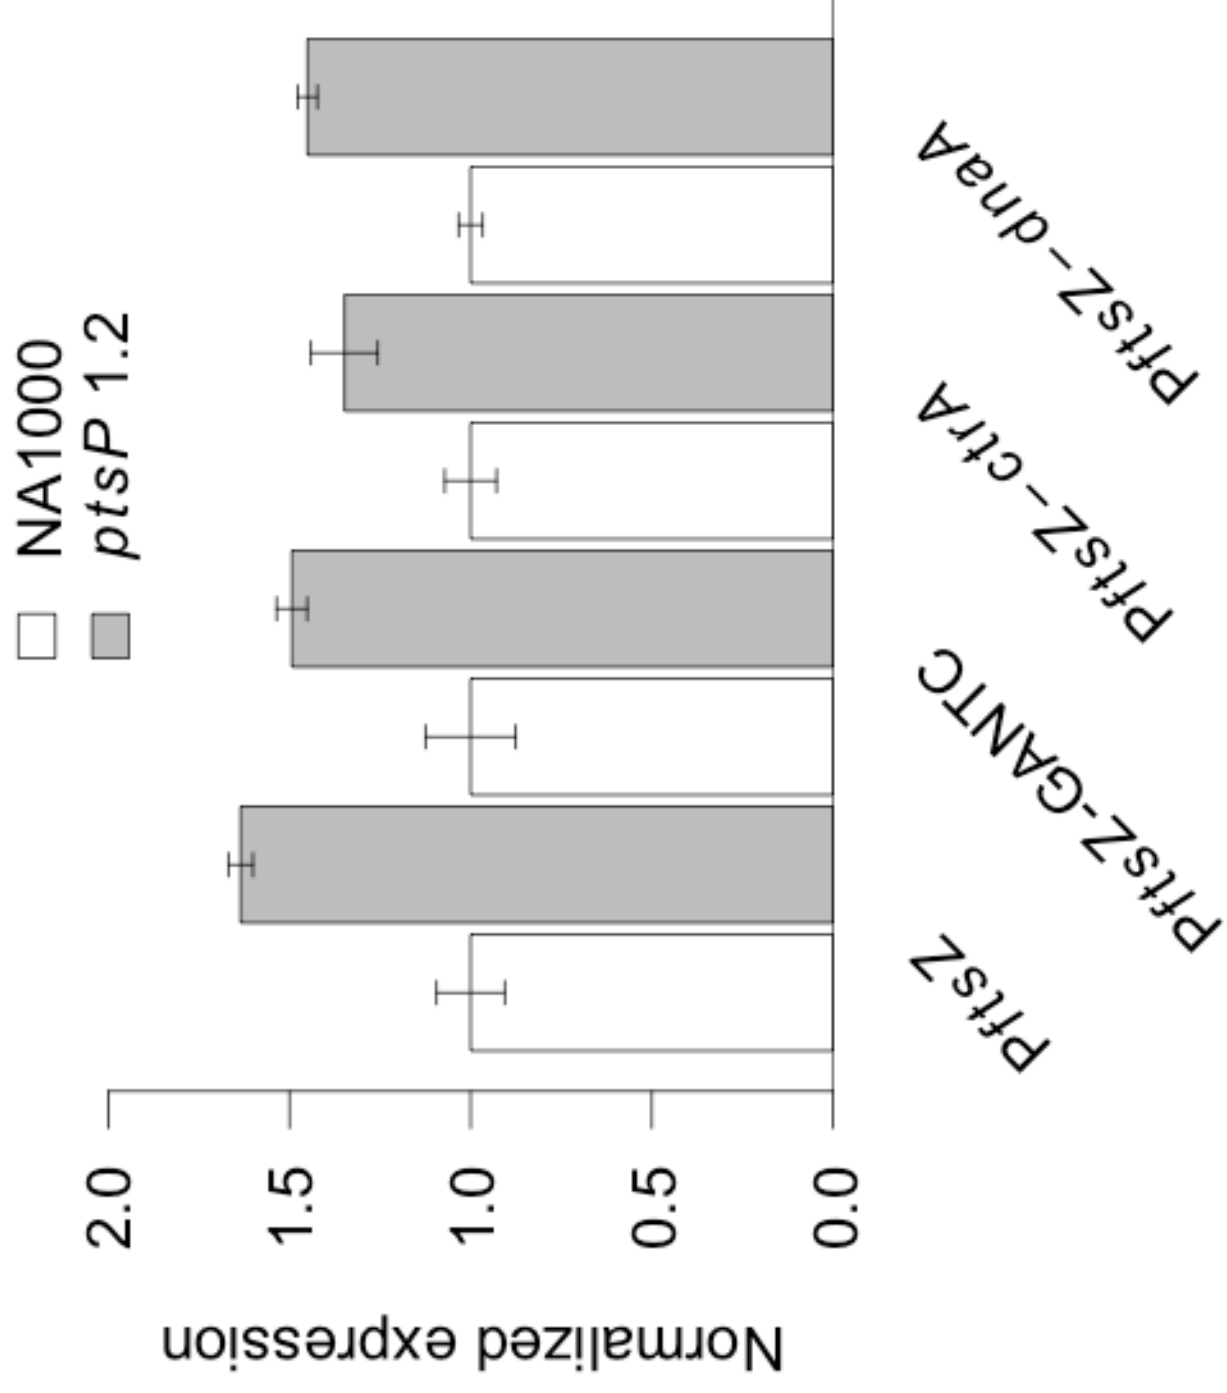

Supplement: mbo004152397sf4.pdf [file mbo004152397sf4.pdf]

## *PmipZ* activity

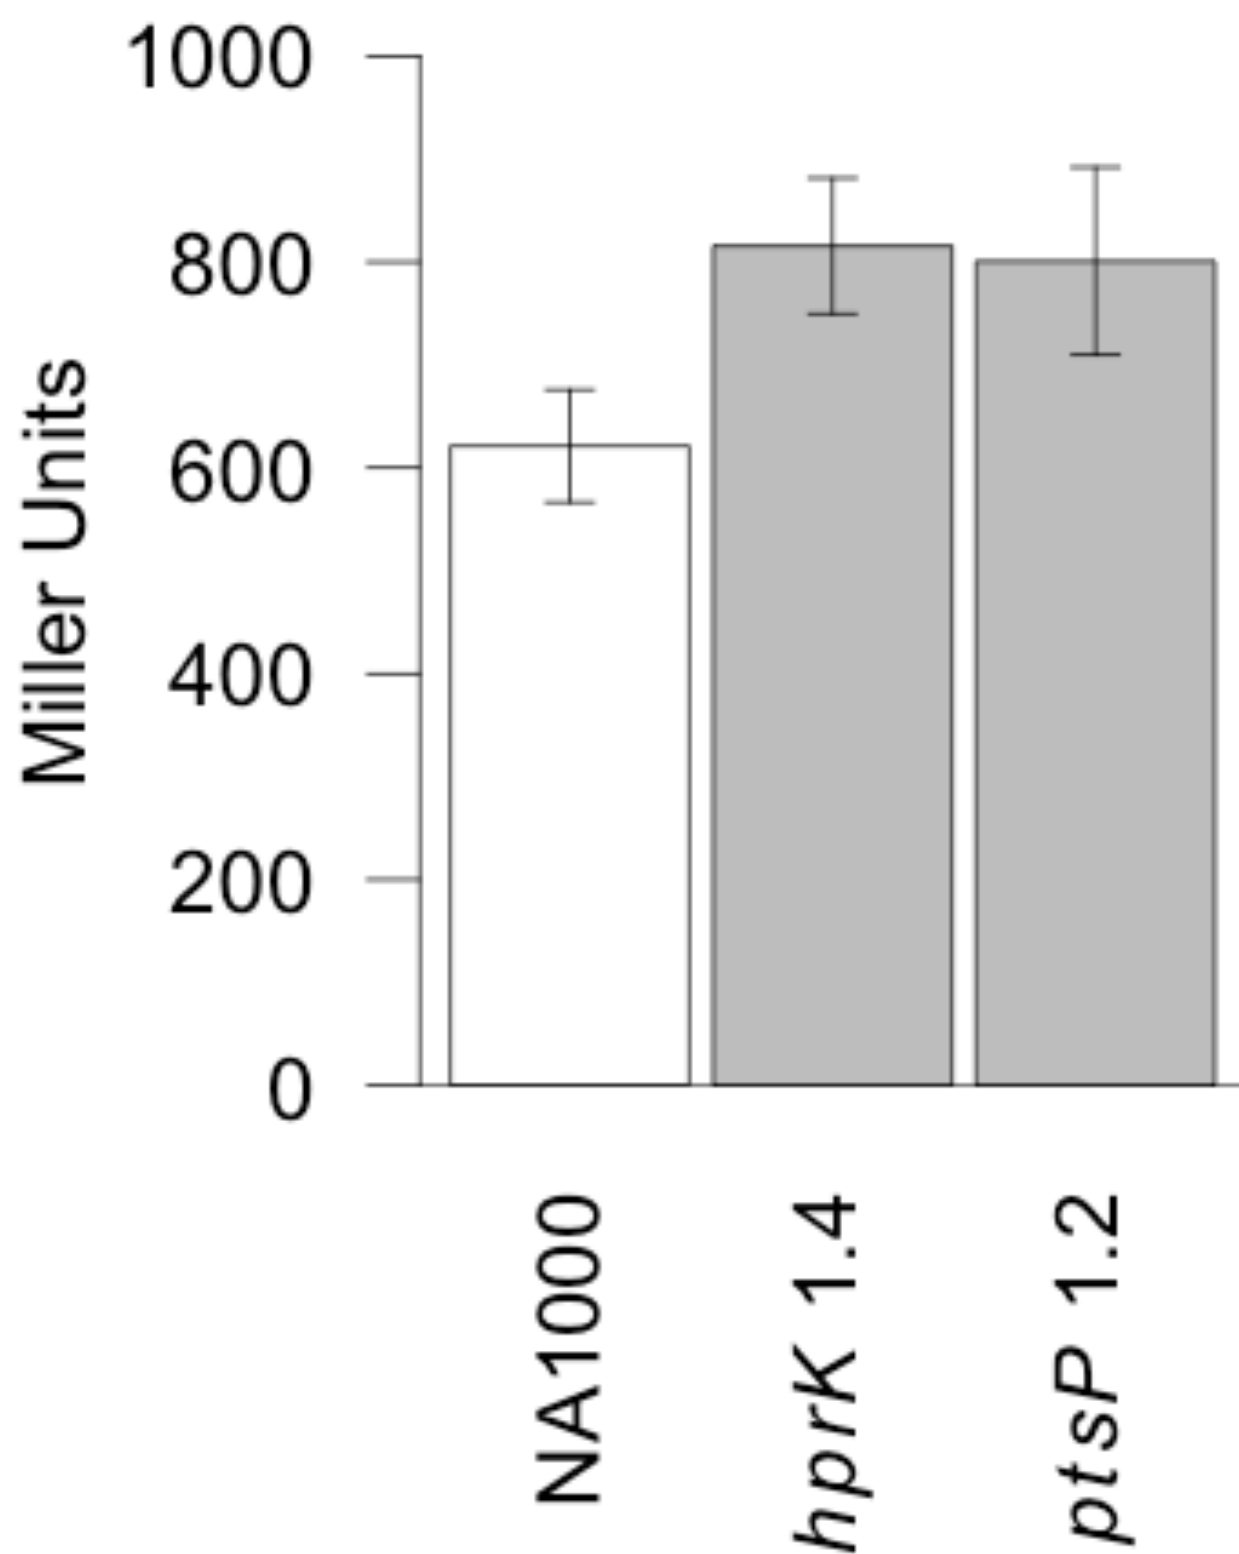

Supplement: mbo004152397sf5.pdf [file mbo004152397sf5.pdf]
